# Supplementary material for: Synthesis of tunable, red fluorescent aggregation-enhanced emissive organic fluorophores: stimuli-responsive high contrast off–on fluorescence switching
Source: Royal Society of Chemistry journal article supplement (doi:10.1039/c7ce01867c), 2017-12-26
Supplement: c7ce01867c1.pdf [file c7ce01867c1.pdf]

Supporting Information

**Synthesis of tunable, red fluorescent aggregation enhanced emissive organic fluorophores:  
Stimuli responsive high contrast off-on fluorescence switching**

Palamarneri Sivaraman Hariharan, Parthasarathy Gayathri, Anu Kundu, Subramanian  
Karthikeyan, Dohyun Moon and Savarimuthu Philip Anthony\*

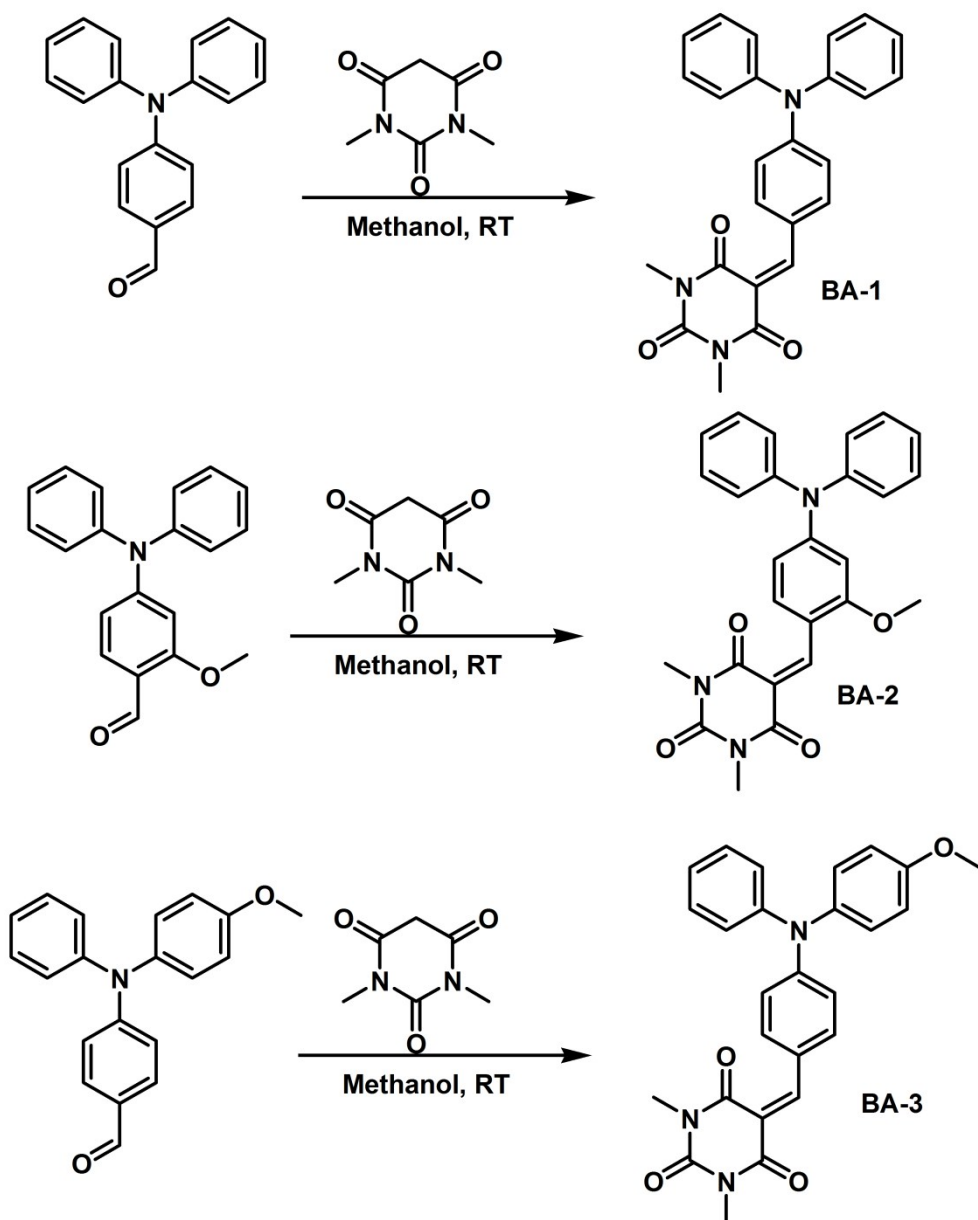

Scheme S1. Synthesis of BA compounds.

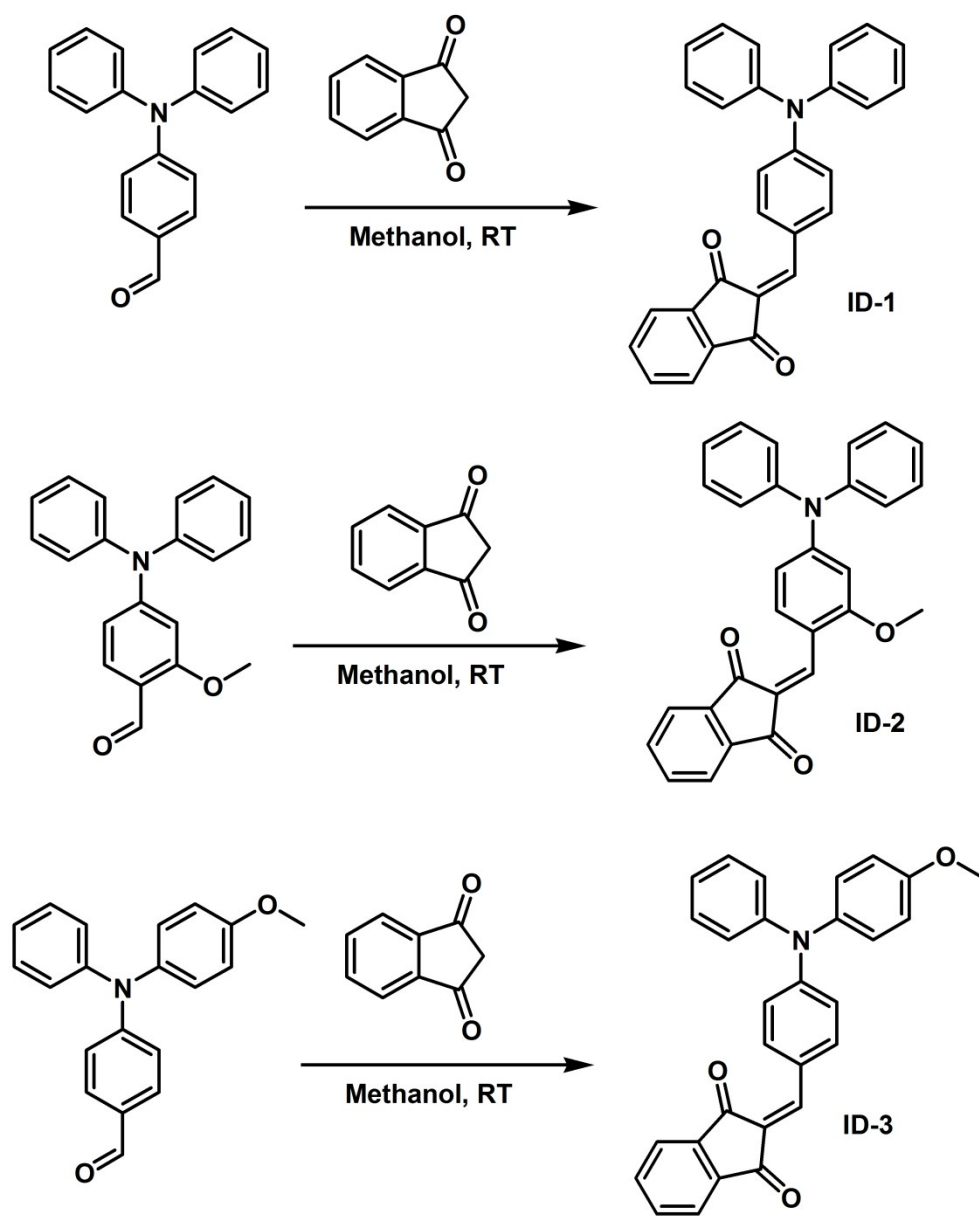

Scheme S2. Synthesis of ID compounds.

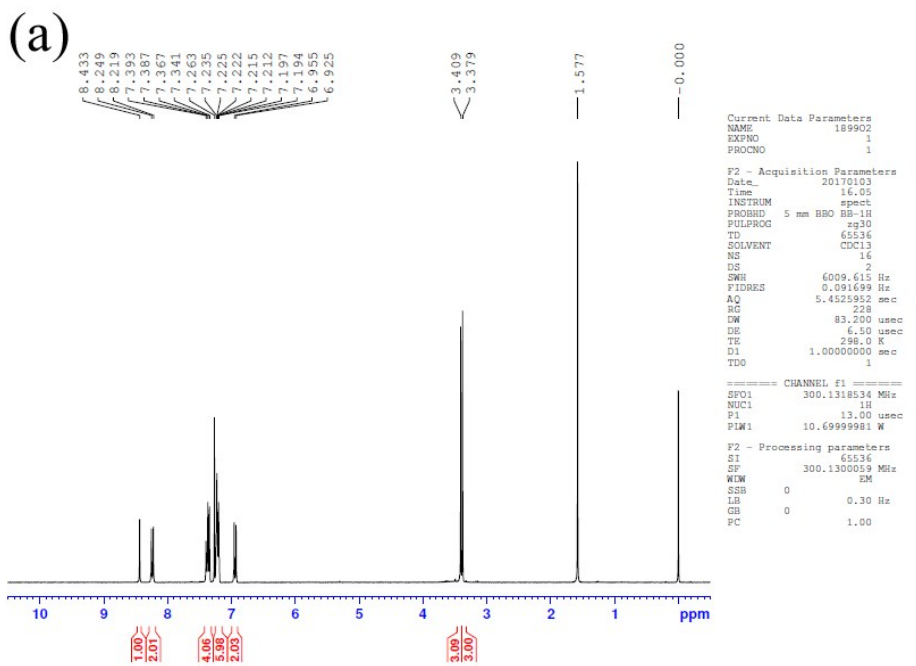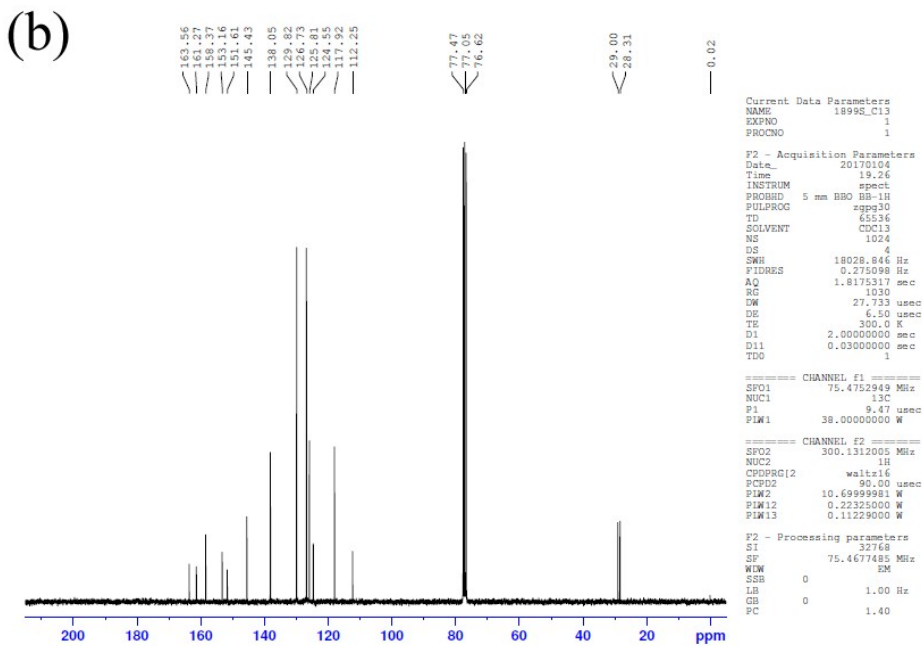

(a)  $^1\text{H}$  and (b)  $^{13}\text{C}$ -NMR spectra of BA-1.

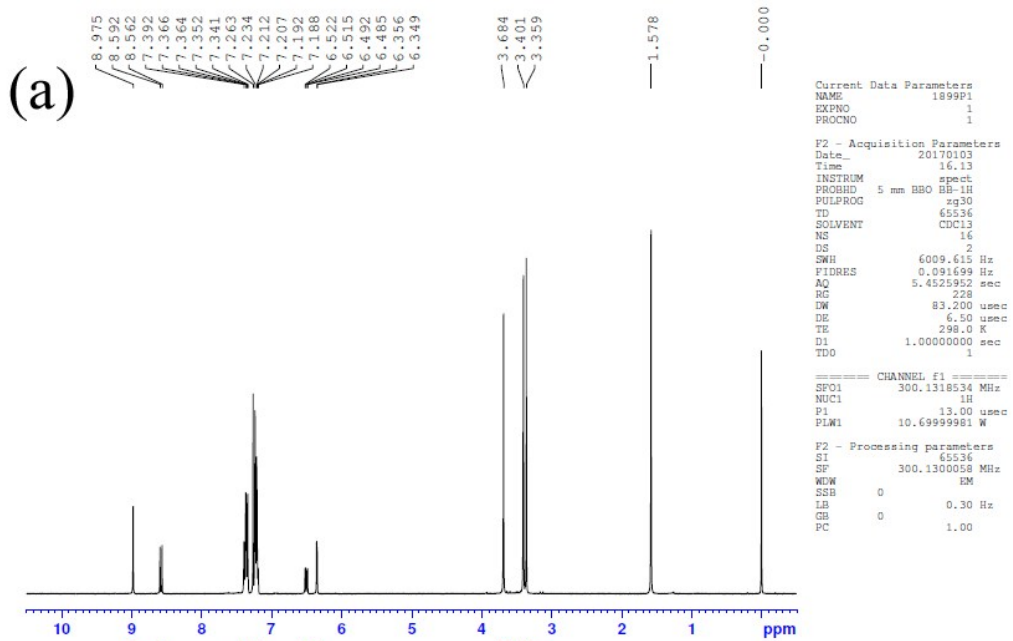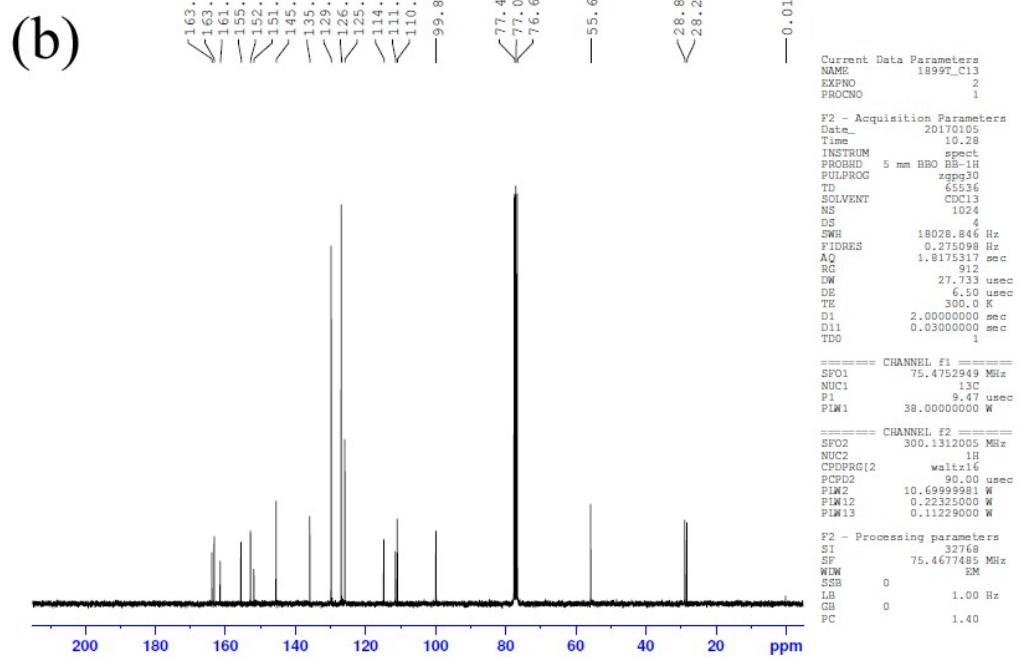

(a)  $^1\text{H}$  and (b)  $^{13}\text{C}$ -NMR spectra of BA-2.

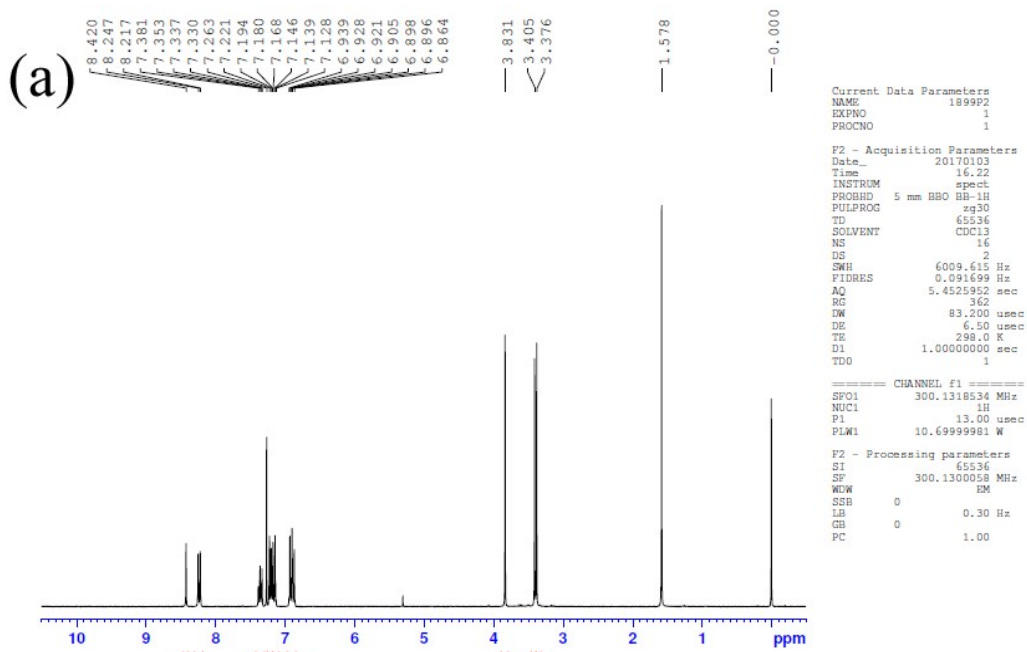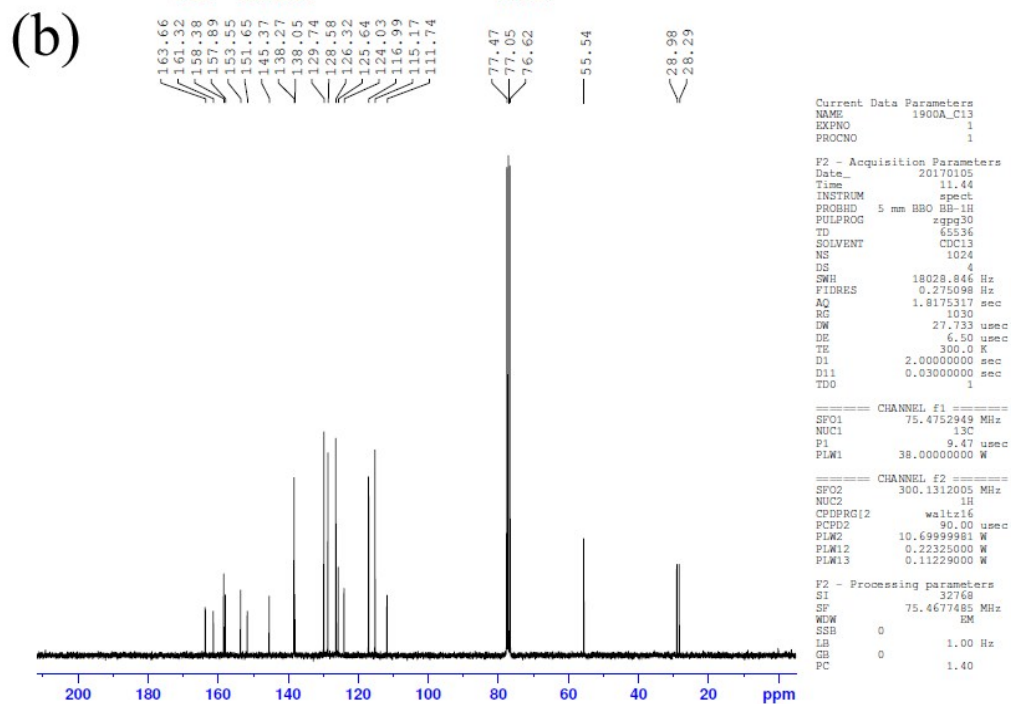

(a)  $^1\text{H}$  and (b)  $^{13}\text{C}$ -NMR spectra of BA-3.

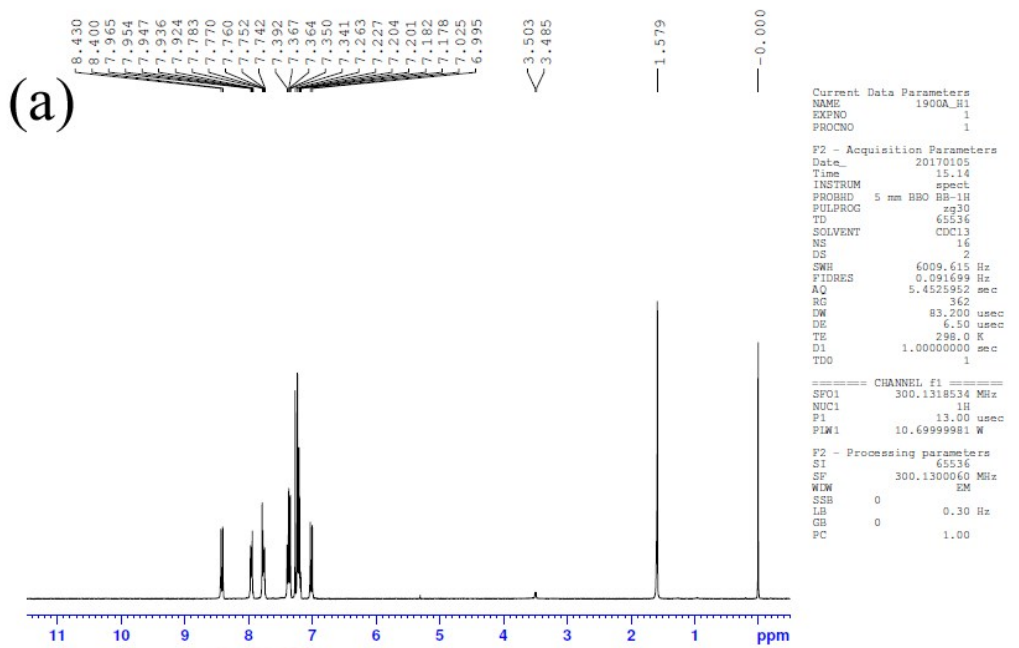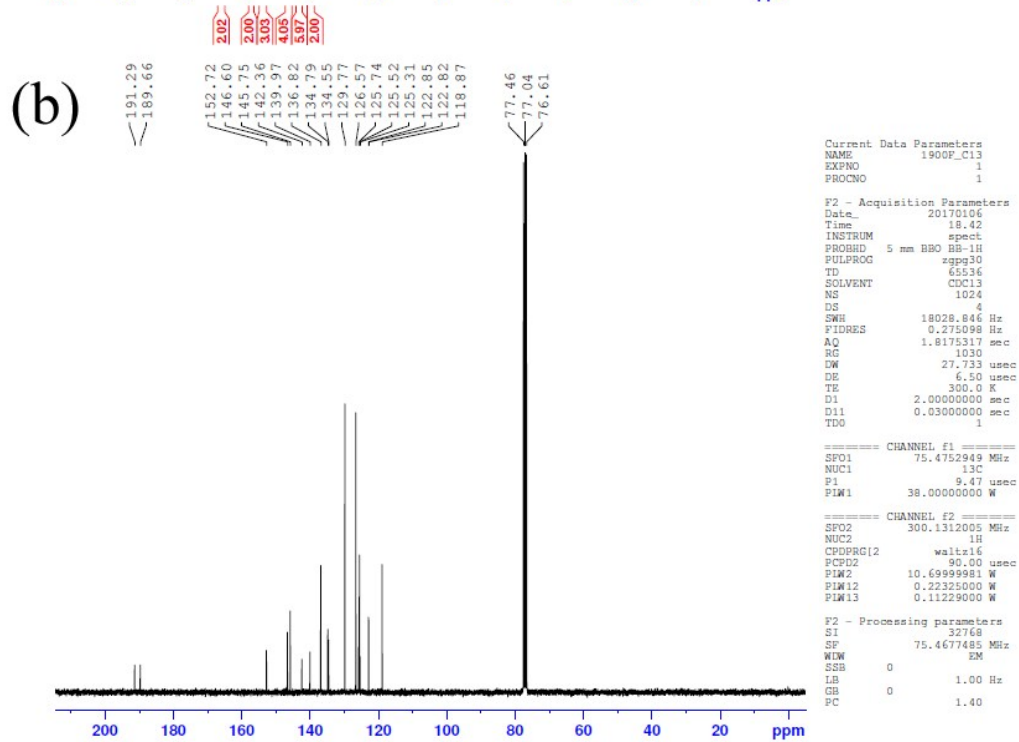

(a)  $^1\text{H}$  and (b)  $^{13}\text{C}$ -NMR spectra of ID-1.

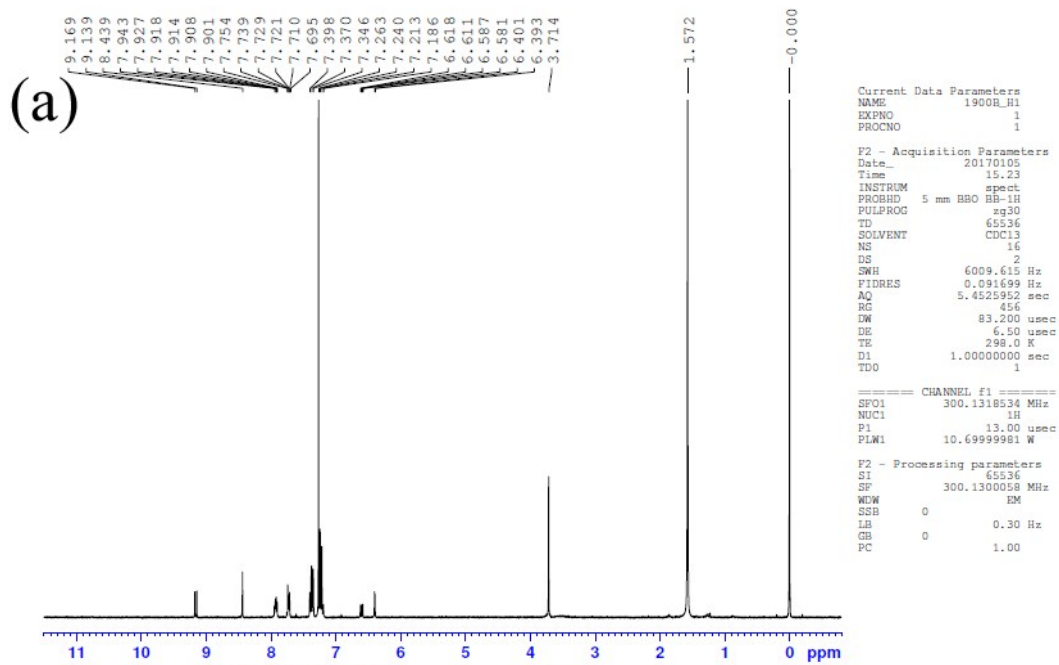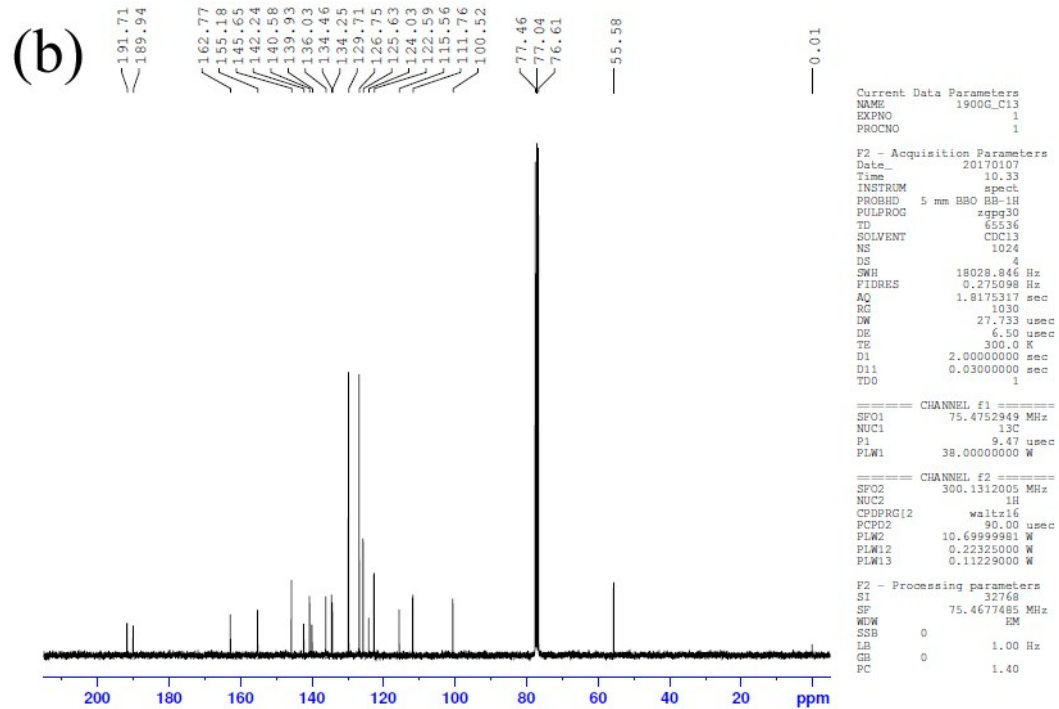

(a)  $^1\text{H}$  and (b)  $^{13}\text{C}$ -NMR spectra of ID-2.

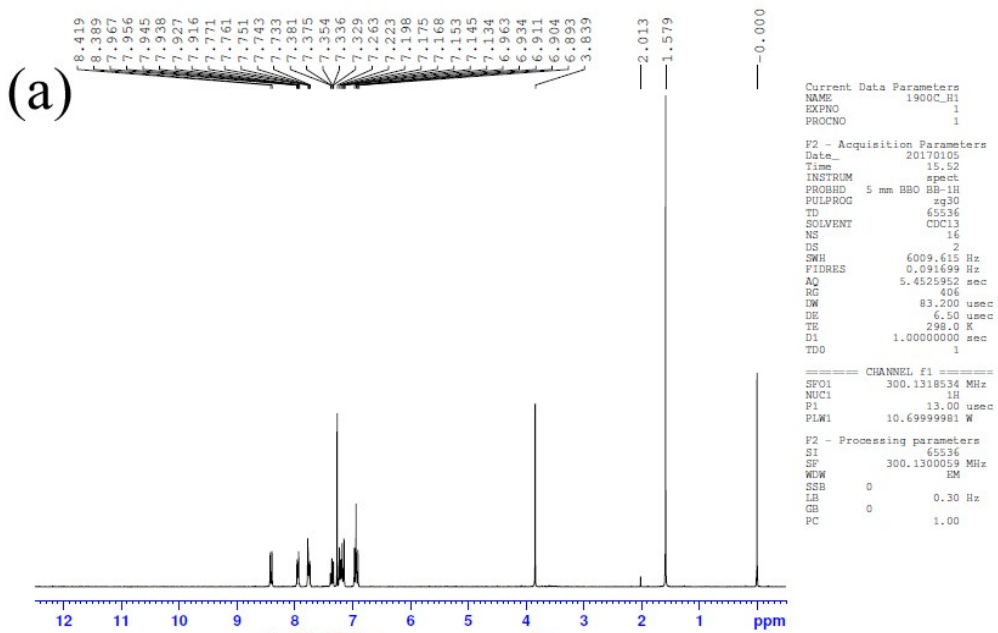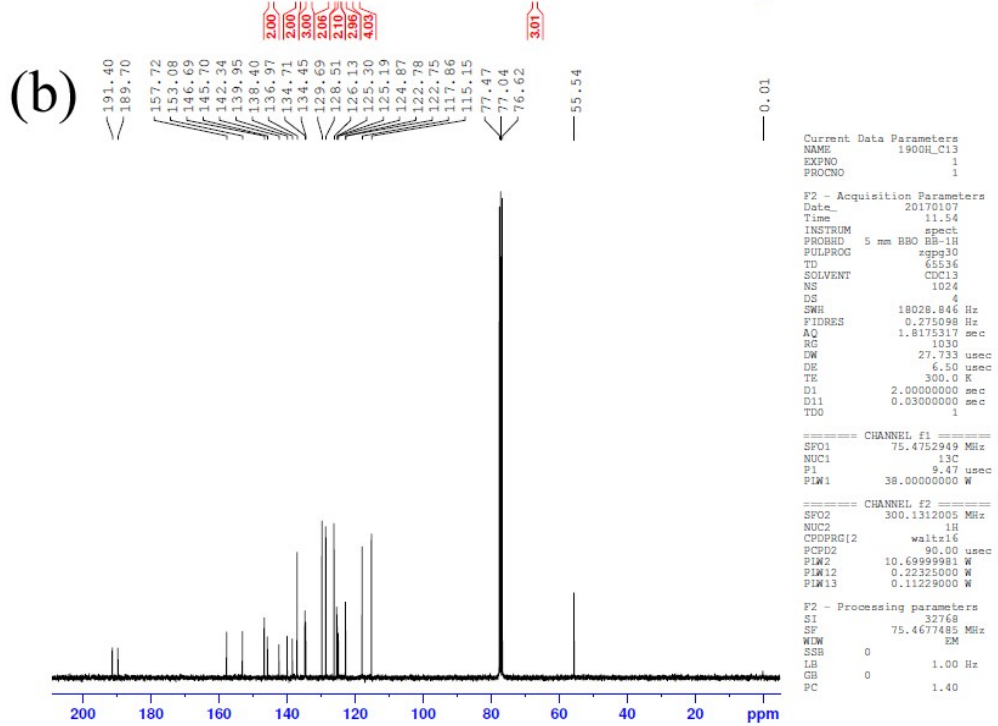

(a)  $^1\text{H}$  and (b)  $^{13}\text{C}$ -NMR spectra of ID-3.



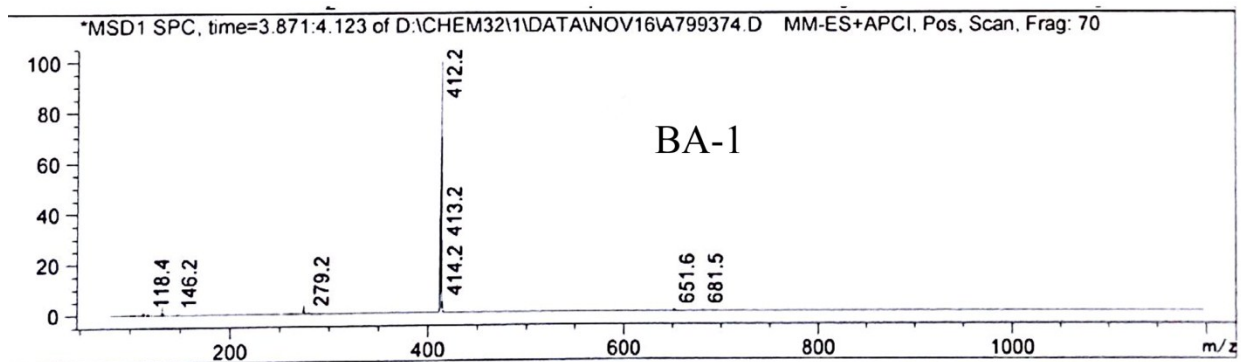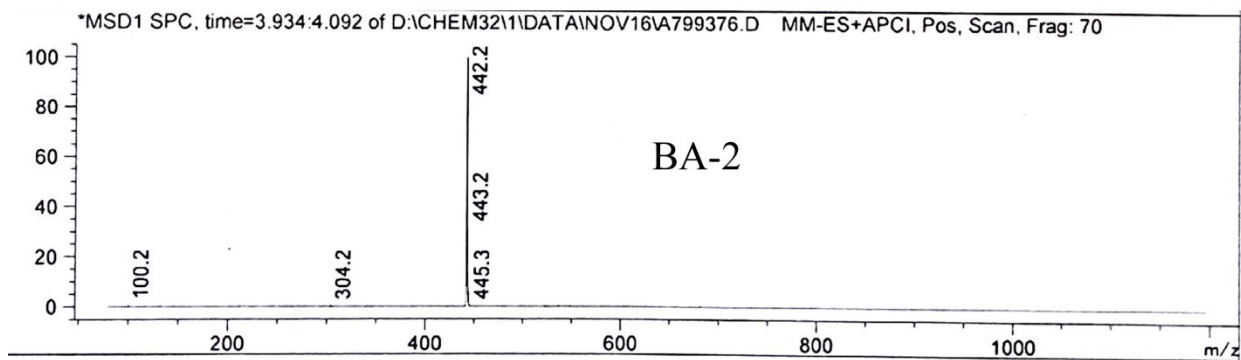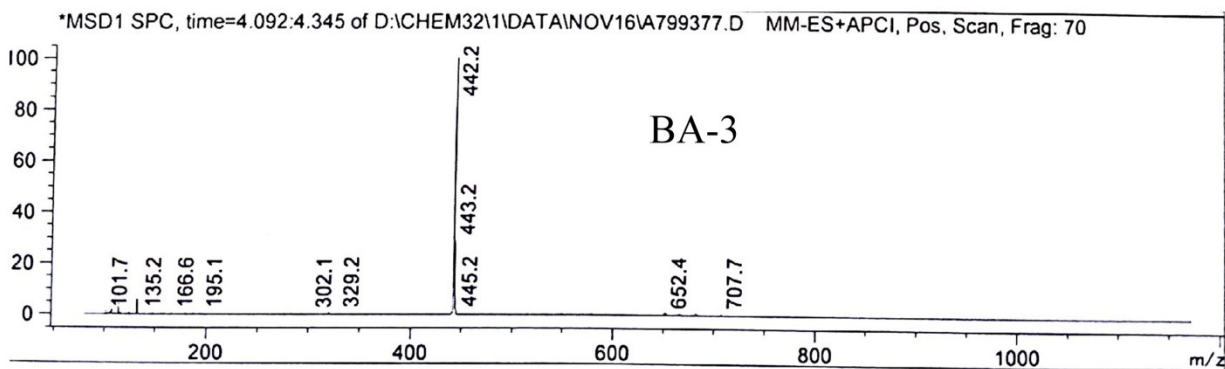

Mass spectra of BA compounds.

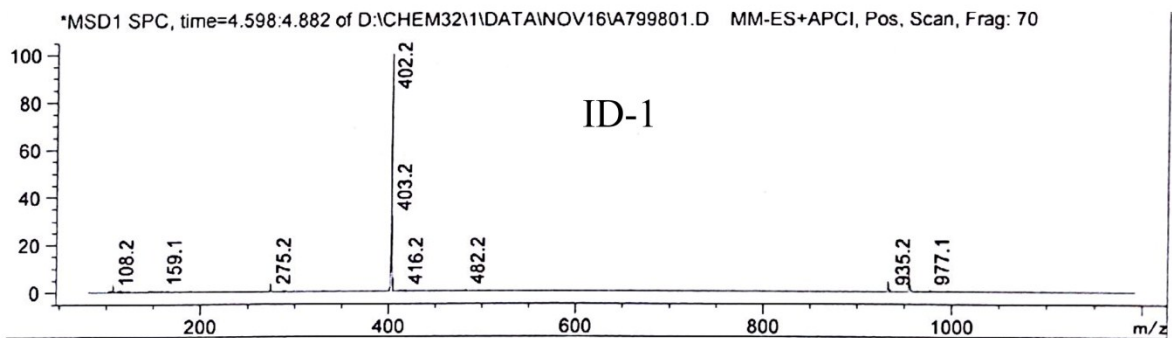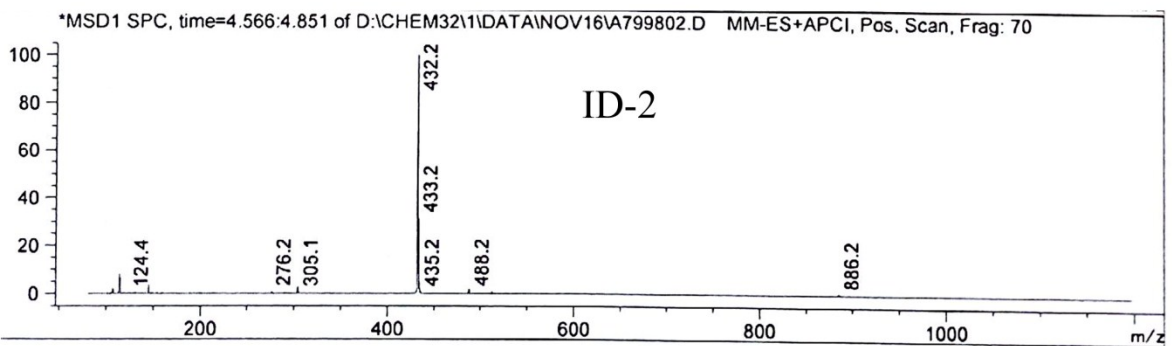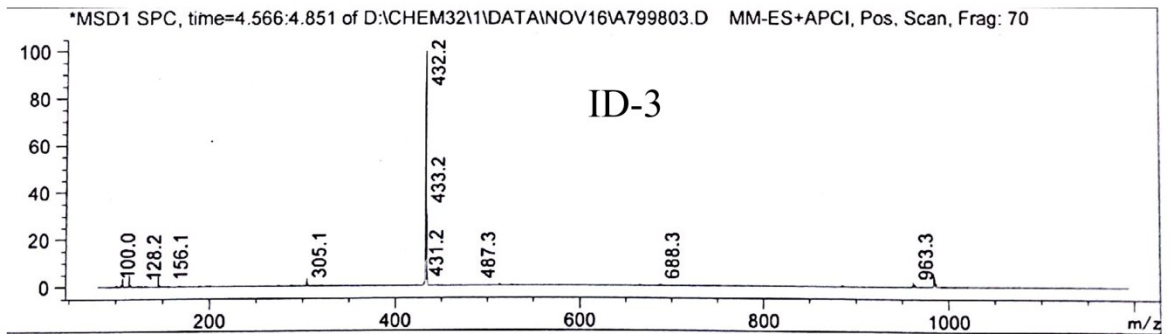

Mass spectra of ID compounds.

Table S1. Quantum yields of BA and ID compounds in CH<sub>3</sub>CN and CH<sub>3</sub>CN-water mixture.

| Solvents                     | BA-1 ( $\Phi_f$ ) | BA-2 ( $\Phi_f$ ) | BA-3 ( $\Phi_f$ ) | ID-1 ( $\Phi_f$ ) | ID-2 ( $\Phi_f$ ) | ID-3 ( $\Phi_f$ ) |
|------------------------------|-------------------|-------------------|-------------------|-------------------|-------------------|-------------------|
| CH <sub>3</sub> CN           | 0.0008            | 0.0026            | 0.0012            | 0.00098           | 0.0016            | 0.0019            |
| CH <sub>3</sub> CN-<br>Water | 0.0231            | 0.080             | 0.032             | 0.0067            | 0.01              | 0.012             |

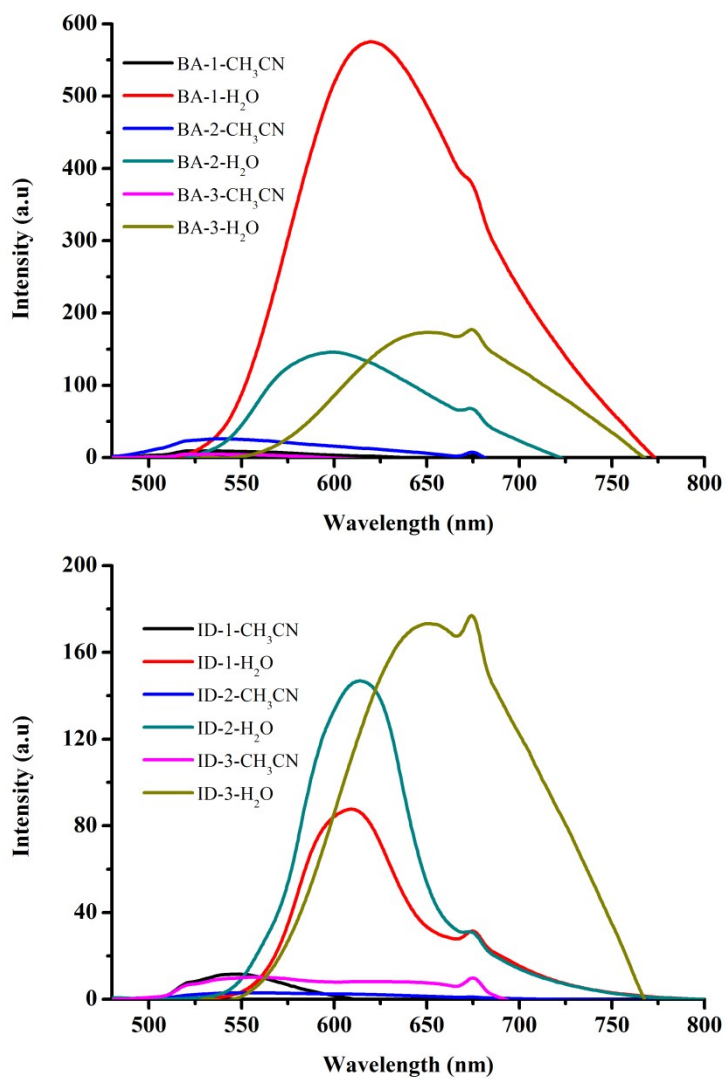

Fig. S1. Fluorescence spectra of BA and ID compounds in CH<sub>3</sub>CN and CH<sub>3</sub>CN-water mixture.

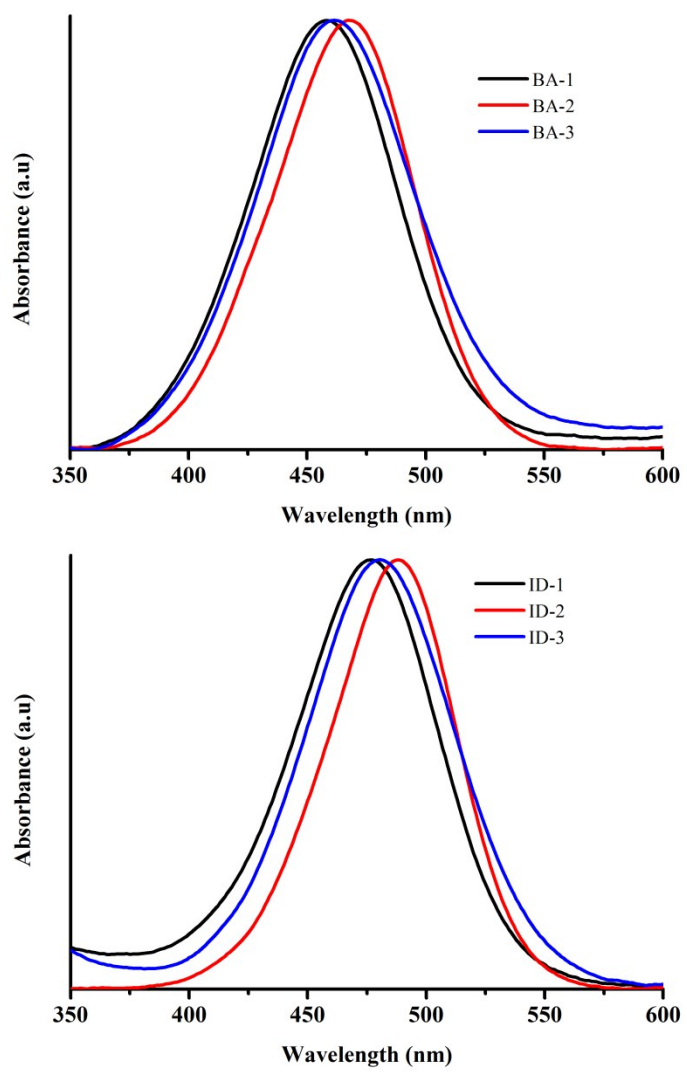

Fig. S2. Absorption spectra of BA and ID compounds in  $\text{CH}_3\text{CN}$ .

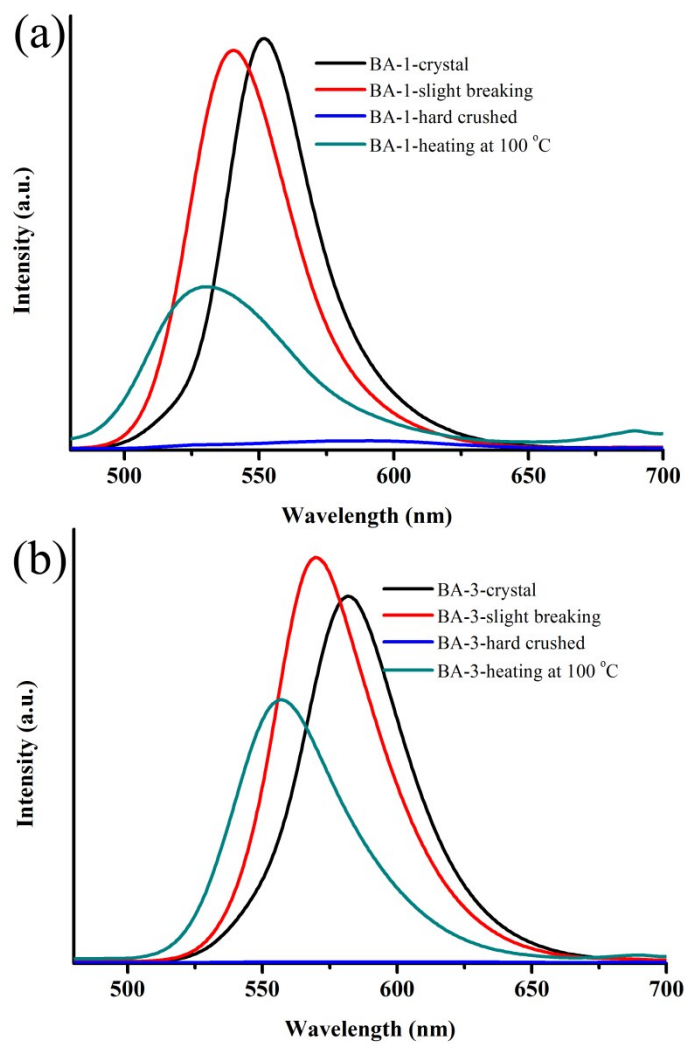

Fig. S3. Solid state fluorescence switching of (a) BA-1 and (b) BA-3 by external stimuli. ( $\lambda_{\text{exc}} = 370$  nm).

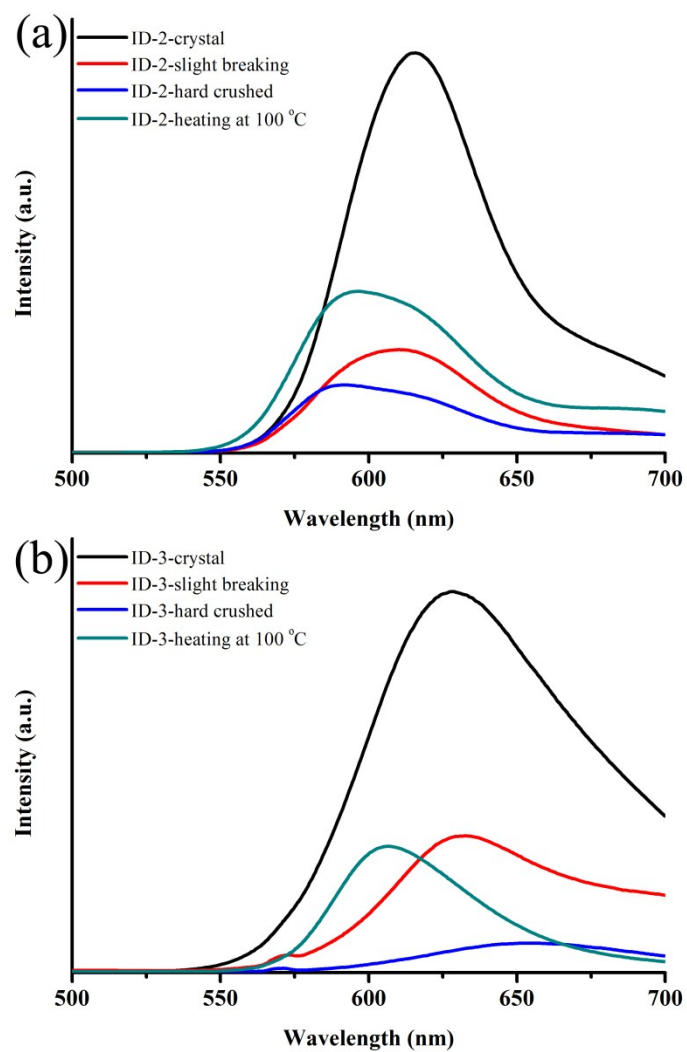

Fig. S4. Solid state fluorescence switching of (a) ID-2 and (b) ID-3 by external stimuli. ( $\lambda_{\text{exc}} = 370 \text{ nm}$ ).

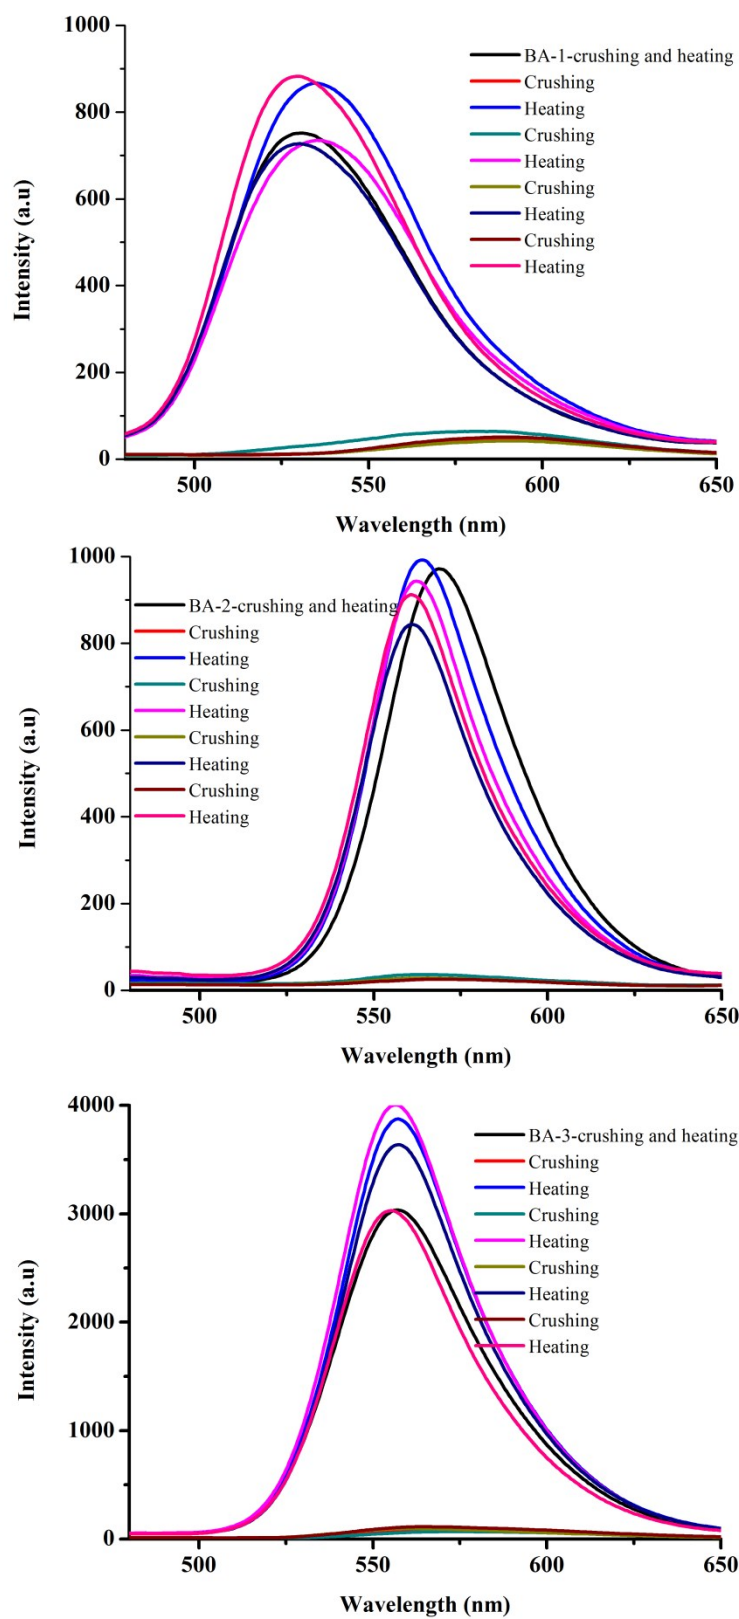

Fig. S5. Solid state fluorescence switching of BA-1-3 by strong crushing followed by heating. ( $\lambda_{exc} = 370$  nm).



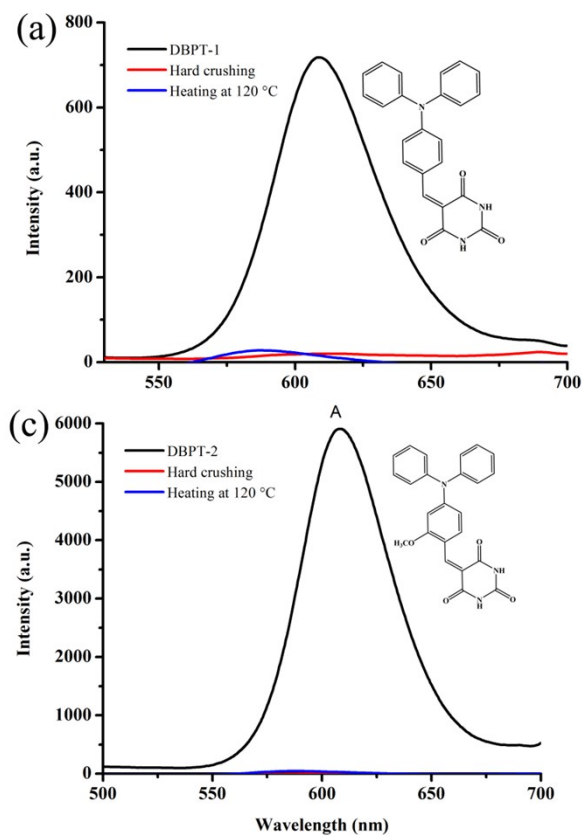

Fig. S6. Solid state fluorescence spectra of (a) DPBT-1 and (b) DPBT-2. ( $\lambda_{\text{exc}} = 370 \text{ nm}$ ).

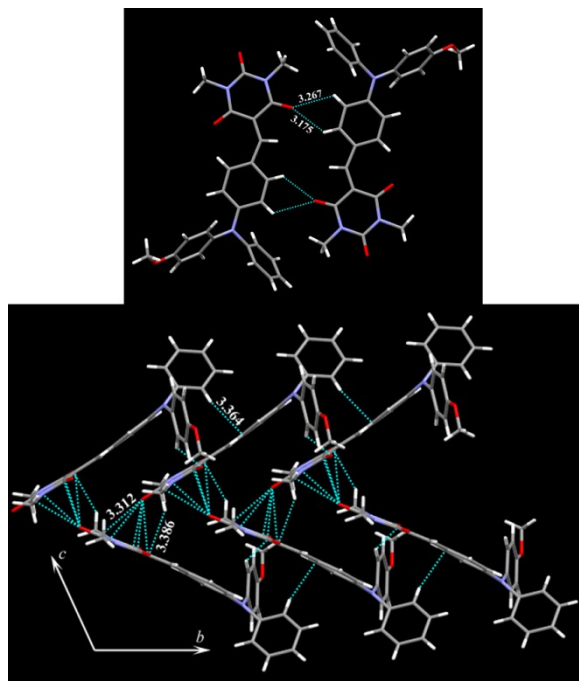

Fig. S7. Dimer formation via H-bonding interaction between oxygen of N-methyl barbituric acid and phenyl hydrogen and extended H-bonding interaction in the crystal lattice of BA-3. C (grey), N (blue), O (red), H (white). H-bonding interactions (broken line) distances are marked in Å.

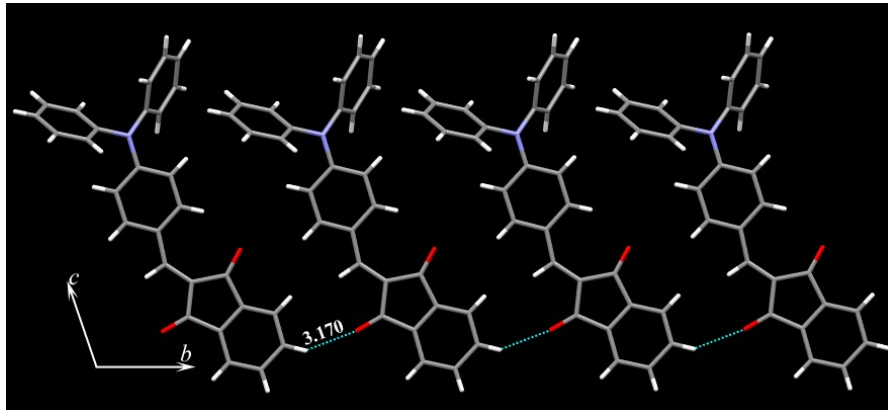

Fig. S8. H-bonding interaction between oxygen of indane dione and indane dione phenyl hydrogen in the crystal lattice of ID-1. C (grey), N (blue), O (red), H (white). H-bonding interactions (broken line) distances are marked in Å.

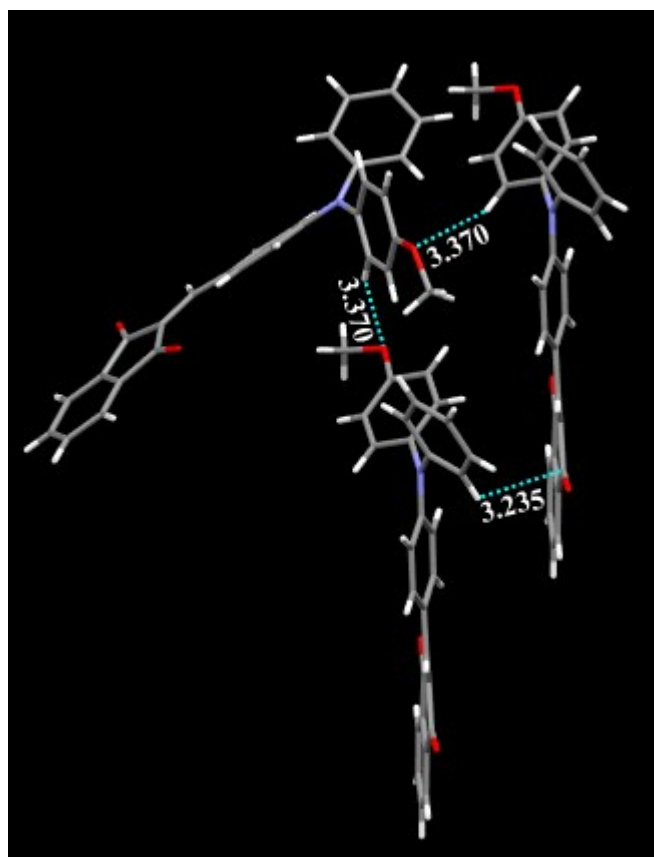

Fig. S9. H-bonding interactions in the crystal lattice of ID-3. C (grey), N (blue), O (red), H (white). H-bonding interactions (broken line) distances are marked in Å.

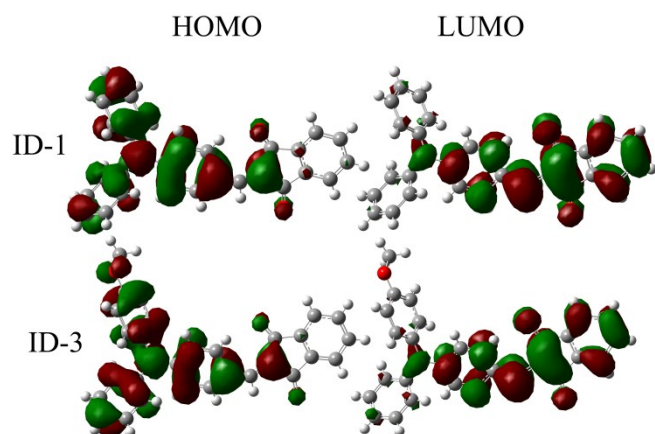

Fig. S10. Molecular orbital plots of the HOMOs and LUMOs of ID compounds.

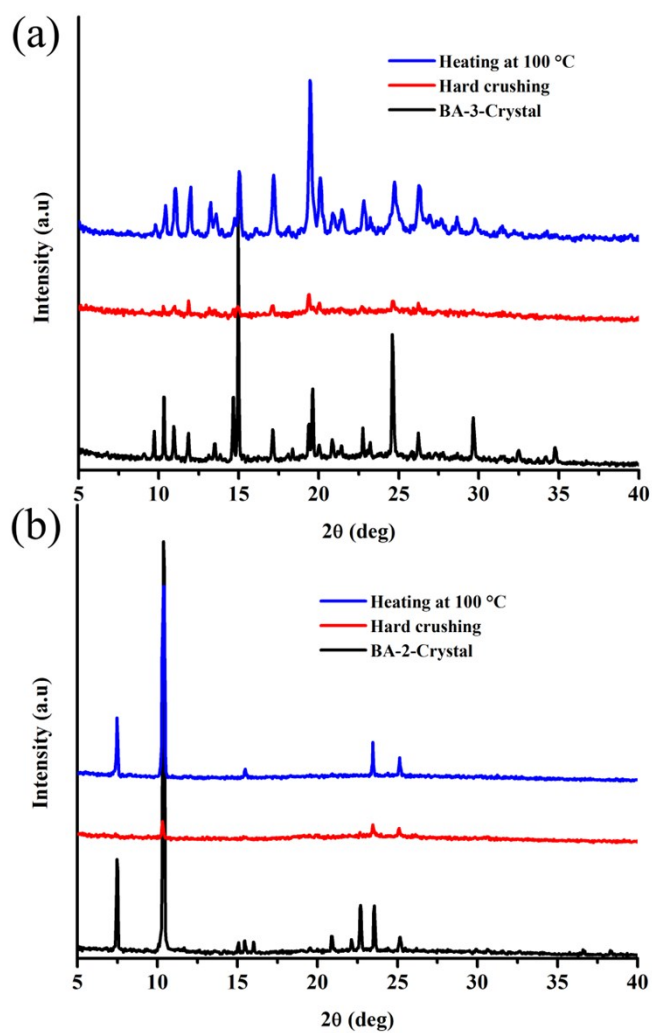

Fig. S11. PXRD pattern of (a) BA-2 and (b) BA-3 before, after hard crushing and heating.

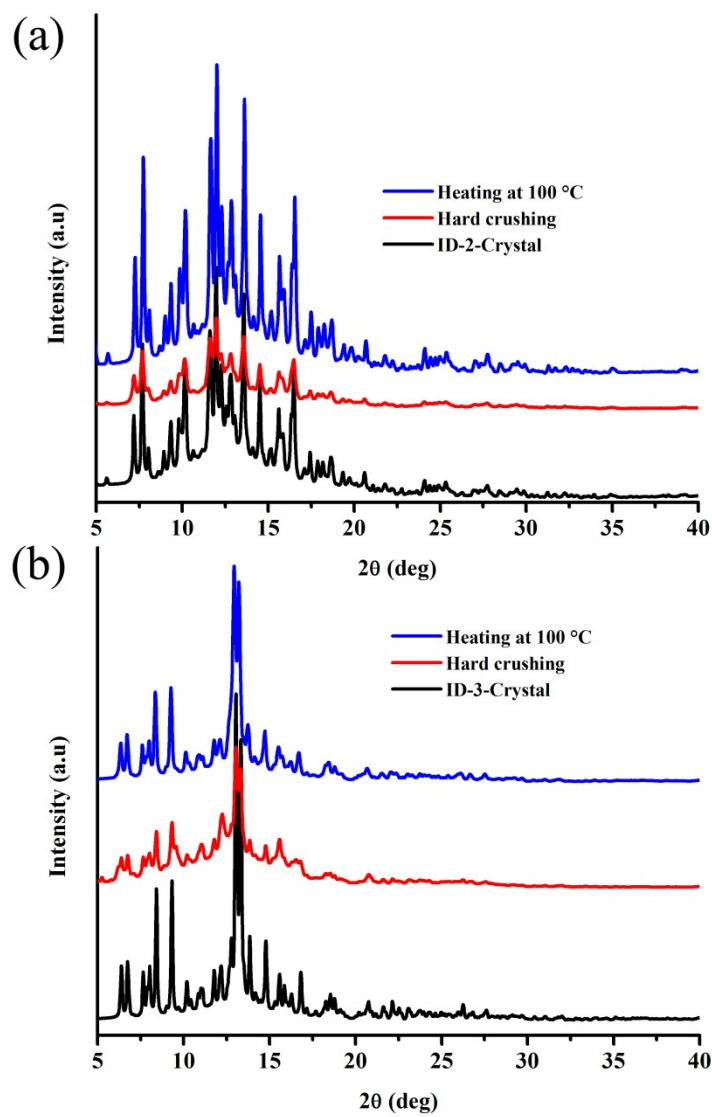

Fig. S12. PXRD pattern of (a) ID-2 and (b) ID-3 before, after hard crushing and heating.

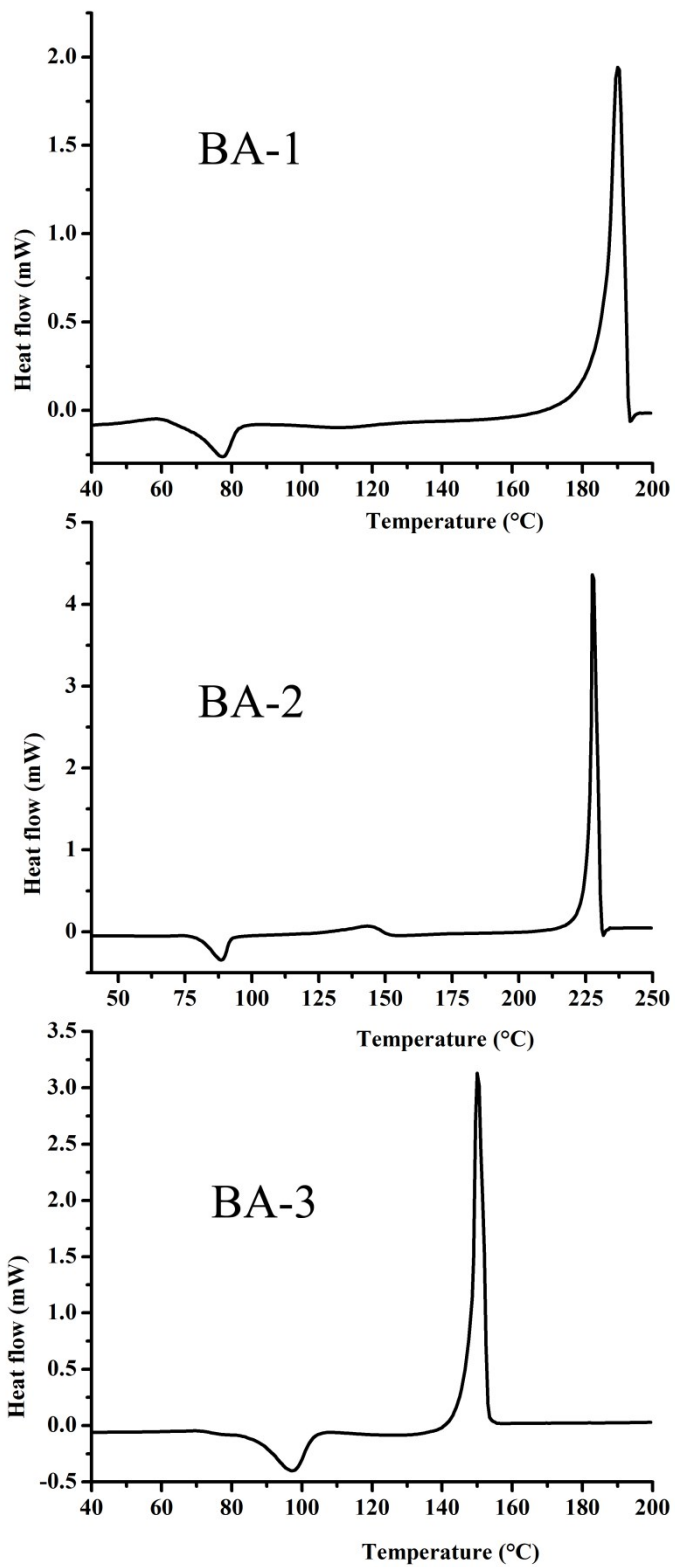

Fig. S13. DSC of BA-1-3.

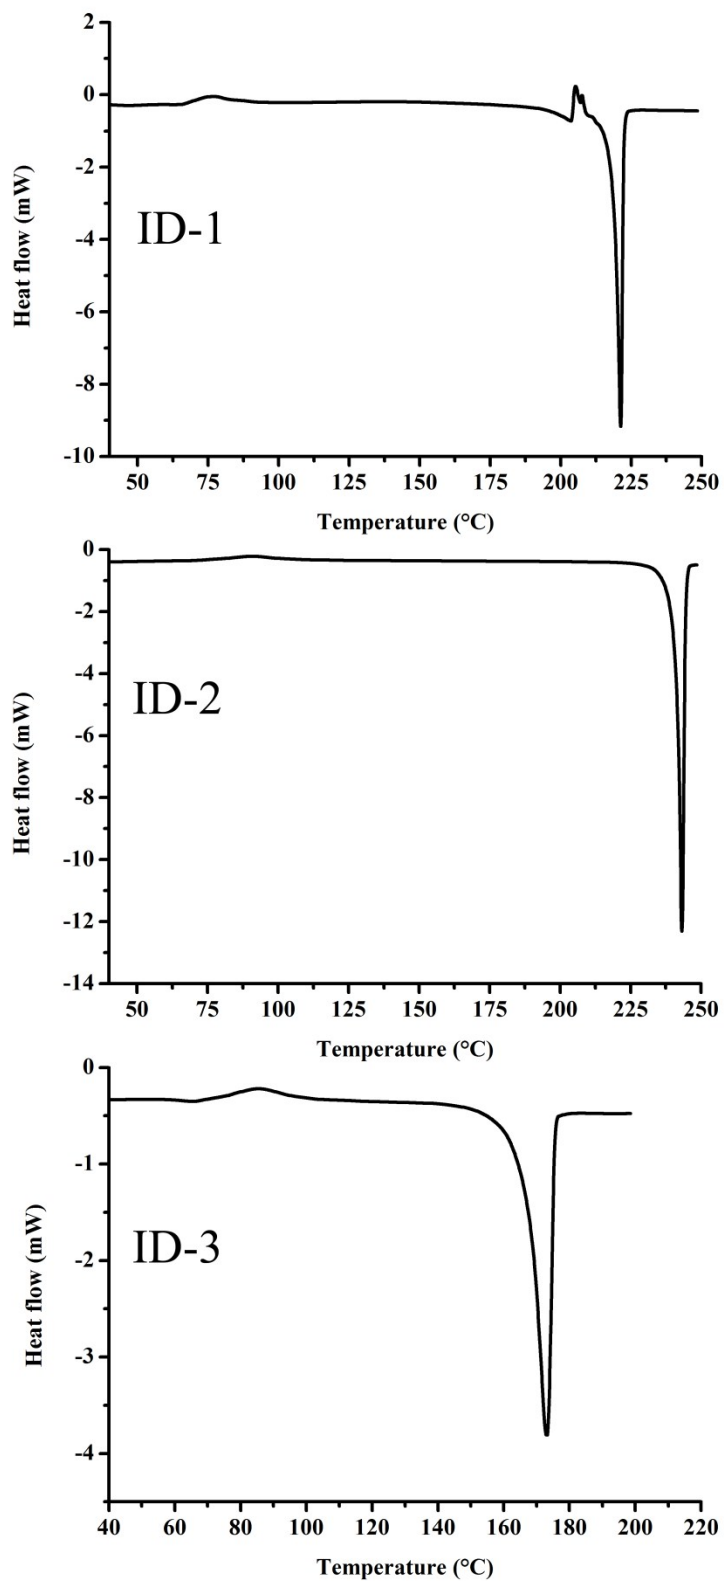

Fig. S14. DSC of ID-1-3.

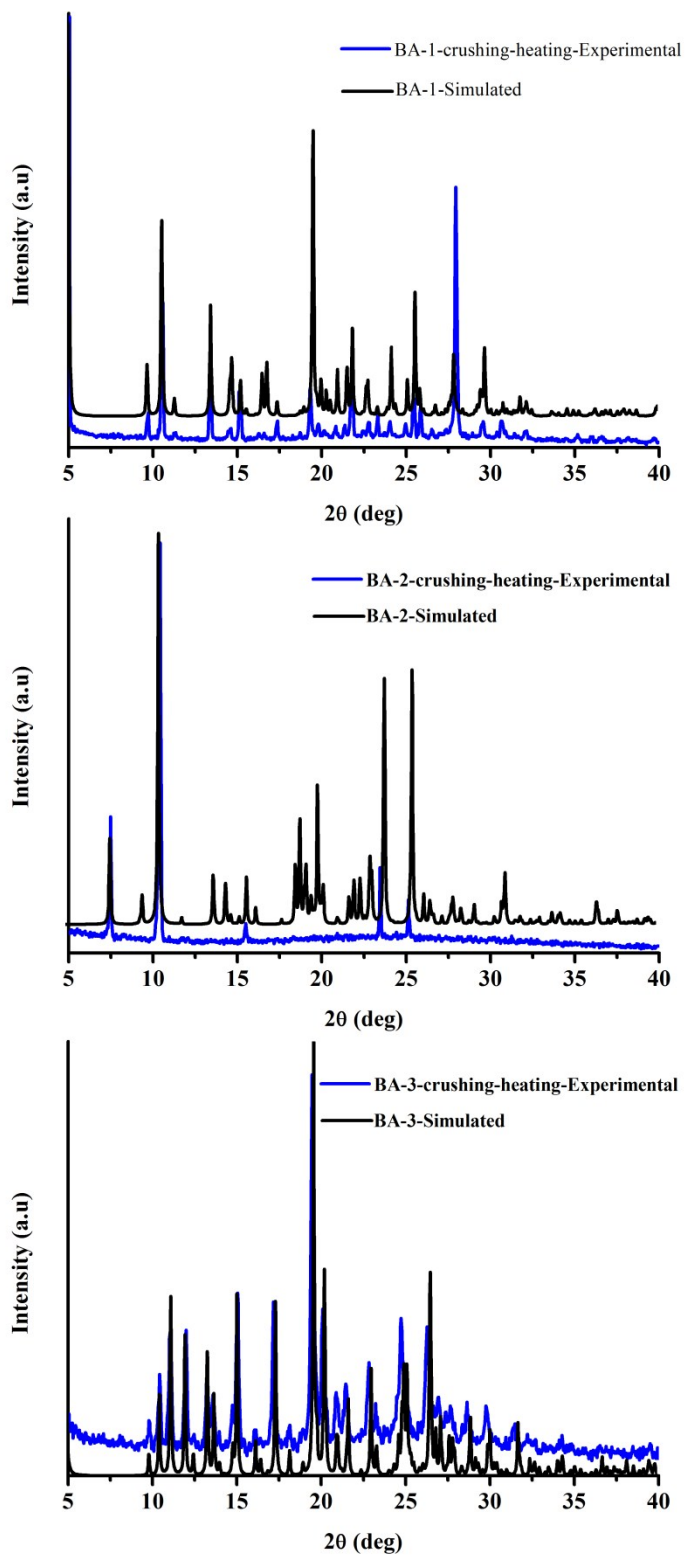

Fig. S15. PXRD pattern of (a) ID-2 and (b) ID-3 before, after hard crushing and heating.
